# Supplementary material for: Hyperbaric Oxygen Therapy Can Diminish Fibromyalgia Syndrome – Prospective Clinical Trial
Source: PubMed Central journal article supplement (PMC4444341; doi:10.1371/journal.pone.0127012), 2015-05-26
Supplement: pone.0127012.s001.pdf [file pone.0127012.s001.pdf]

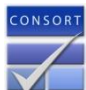

## SI3: CONSORT 2010 checklist of information to include when reporting a randomised trial

| Section/Topic             | Item No | Checklist item                                                                                                                        | Reported on page No                        |
|---------------------------|---------|---------------------------------------------------------------------------------------------------------------------------------------|--------------------------------------------|
| <b>Title and abstract</b> |         |                                                                                                                                       |                                            |
|                           | 1a      | Identification as a randomised trial in the title                                                                                     | <u>Article title</u>                       |
|                           | 1b      | Structured summary of trial design, methods, results, and conclusions (for specific guidance see CONSORT for abstracts)               | <u>Article methods</u>                     |
| <b>Introduction</b>       |         |                                                                                                                                       |                                            |
| Background and objectives | 2a      | Scientific background and explanation of rationale                                                                                    | <u>Article introduction</u>                |
|                           | 2b      | Specific objectives or hypotheses                                                                                                     | <u>Article introduction</u>                |
| <b>Methods</b>            |         |                                                                                                                                       |                                            |
| Trial design              | 3a      | Description of trial design (such as parallel, factorial) including allocation ratio                                                  | <u>Article methods, Study protocol-SI1</u> |
|                           | 3b      | Important changes to methods after trial commencement (such as eligibility criteria), with reasons                                    | <u>Article methods, Study protocol-SI1</u> |
| Participants              | 4a      | Eligibility criteria for participants                                                                                                 | <u>Article methods, Study protocol-SI1</u> |
|                           | 4b      | Settings and locations where the data were collected                                                                                  | <u>Article Methods</u>                     |
| Interventions             | 5       | The interventions for each group with sufficient details to allow replication, including how and when they were actually administered | <u>Article methods, Study protocol-SI1</u> |
| Outcomes                  | 6a      | Completely defined pre-specified primary and secondary outcome measures, including how and when they were assessed                    | <u>Article methods, Study protocol-SI1</u> |
|                           | 6b      | Any changes to trial outcomes after the trial commenced, with reasons                                                                 | <u>Article methods, Study protocol-SI1</u> |

|                                                      |     |                                                                                                                                                                                             |                                      |
|------------------------------------------------------|-----|---------------------------------------------------------------------------------------------------------------------------------------------------------------------------------------------|--------------------------------------|
| Sample size                                          | 7a  | How sample size was determined                                                                                                                                                              | Study protocol-SI1                   |
|                                                      | 7b  | When applicable, explanation of any interim analyses and stopping guidelines                                                                                                                |                                      |
| Randomisation:<br>Sequence generation                | 8a  | Method used to generate the random allocation sequence                                                                                                                                      | Article methods, Study protocol-SI1  |
|                                                      | 8b  | Type of randomisation; details of any restriction (such as blocking and block size)                                                                                                         | Article methods, Study protocol-SI1  |
| Allocation concealment mechanism                     | 9   | Mechanism used to implement the random allocation sequence (such as sequentially numbered containers), describing any steps taken to conceal the sequence until interventions were assigned | Article methods, Study protocol-SI1  |
| Implementation                                       | 10  | Who generated the random allocation sequence, who enrolled participants, and who assigned participants to interventions                                                                     | Article: methods, Study protocol-SI1 |
| Blinding                                             | 11a | If done, who was blinded after assignment to interventions (for example, participants, care providers, those assessing outcomes) and how                                                    | Article methods, Study protocol-SI1  |
|                                                      | 11b | If relevant, description of the similarity of interventions                                                                                                                                 |                                      |
| Statistical methods                                  | 12a | Statistical methods used to compare groups for primary and secondary outcomes                                                                                                               | Article methods                      |
|                                                      | 12b | Methods for additional analyses, such as subgroup analyses and adjusted analyses                                                                                                            | Article methods                      |
| <b>Results</b>                                       |     |                                                                                                                                                                                             |                                      |
| Participant flow (a diagram is strongly recommended) | 13a | For each group, the numbers of participants who were randomly assigned, received intended treatment, and were analysed for the primary outcome                                              | Article results                      |
|                                                      | 13b | For each group, losses and exclusions after randomisation, together with reasons                                                                                                            | Article results                      |
| Recruitment                                          | 14a | Dates defining the periods of recruitment and follow-up                                                                                                                                     | Article results                      |
|                                                      | 14b | Why the trial ended or was stopped                                                                                                                                                          | Sample size                          |
| Baseline data                                        | 15  | A table showing baseline demographic and clinical characteristics for each group                                                                                                            | Article results                      |
| Numbers analysed                                     | 16  | For each group, number of participants (denominator) included in each analysis and whether the analysis was by original assigned groups                                                     | Article results                      |
| Outcomes and                                         | 17a | For each primary and secondary outcome, results for each group, and the estimated effect size and its                                                                                       | Article results                      |

|                          |     |                                                                                                                                           |                                                      |
|--------------------------|-----|-------------------------------------------------------------------------------------------------------------------------------------------|------------------------------------------------------|
| estimation               |     | precision (such as 95% confidence interval)                                                                                               |                                                      |
|                          | 17b | For binary outcomes, presentation of both absolute and relative effect sizes is recommended                                               |                                                      |
| Ancillary analyses       | 18  | Results of any other analyses performed, including subgroup analyses and adjusted analyses, distinguishing pre-specified from exploratory | Article results                                      |
| Harms                    | 19  | All important harms or unintended effects in each group (for specific guidance see CONSORT for harms)                                     | Article results                                      |
| <b>Discussion</b>        |     |                                                                                                                                           |                                                      |
| Limitations              | 20  | Trial limitations, addressing sources of potential bias, imprecision, and, if relevant, multiplicity of analyses                          | Article discussion                                   |
| Generalisability         | 21  | Generalisability (external validity, applicability) of the trial findings                                                                 | Article discussion                                   |
| Interpretation           | 22  | Interpretation consistent with results, balancing benefits and harms, and considering other relevant evidence                             | Article discussion                                   |
| <b>Other information</b> |     |                                                                                                                                           |                                                      |
| Registration             | 23  | Registration number and name of trial registry                                                                                            | Article 1 <sup>st</sup> page                         |
| Protocol                 | 24  | Where the full trial protocol can be accessed, if available                                                                               | Study protocol-S1                                    |
| Funding                  | 25  | Sources of funding and other support (such as supply of drugs), role of funders                                                           | Article 1 <sup>st</sup> page<br>Financial Disclosure |
